# Supplementary material for: One model fits all: Combining inference and simulation of gene regulatory networks
Source: PubMed Central journal article supplement (PMC10079230; doi:10.1371/journal.pcbi.1010962), 2023-03-27

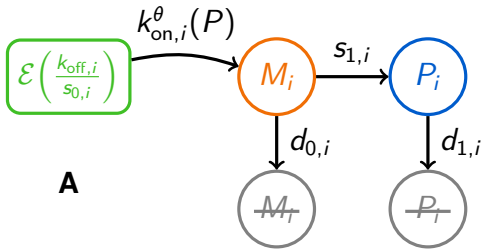

**B**

$$\left\{ \begin{array}{l} M_i(t) \xrightarrow{k_{\text{on},i}^\theta(P(t))} M_i(t) + \mathcal{E}\left(\frac{k_{\text{off},i}}{s_{0,i}}\right) \\ M_i'(t) = -d_{0,i}M_i(t) \\ P_i'(t) = s_{1,i}M_i(t) - d_{1,i}P_i(t) \end{array} \right.$$

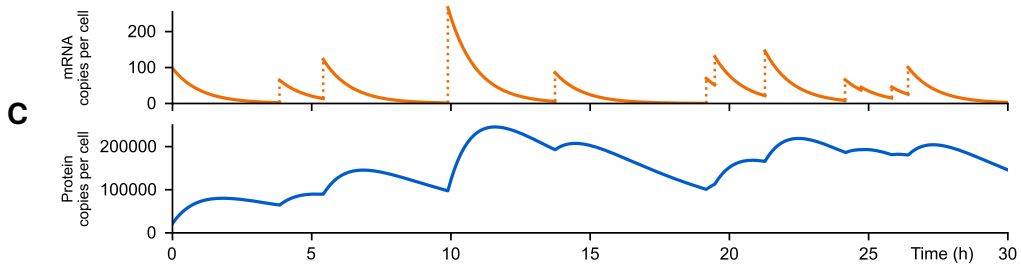

Supplement: pcbi.1010962.s003.pdf [file pcbi.1010962.s003.pdf]
