# Supplementary material for: One model fits all: Combining inference and simulation of gene regulatory networks
Source: PubMed Central journal article supplement (PMC10079230; doi:10.1371/journal.pcbi.1010962), 2023-03-27

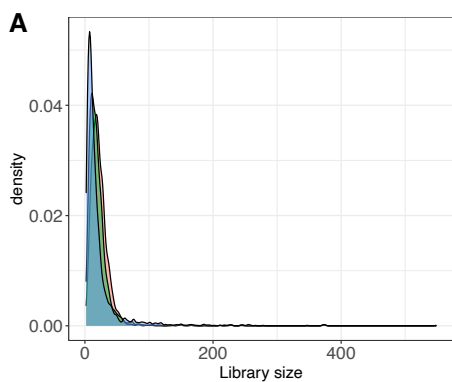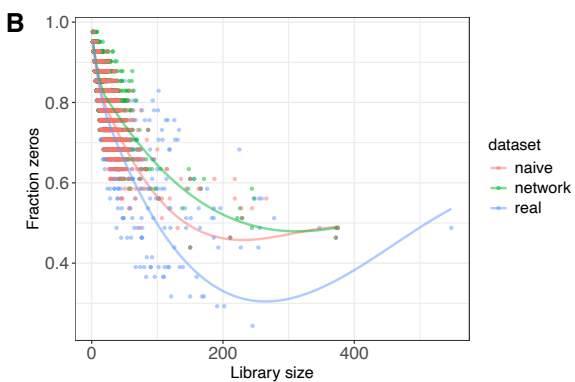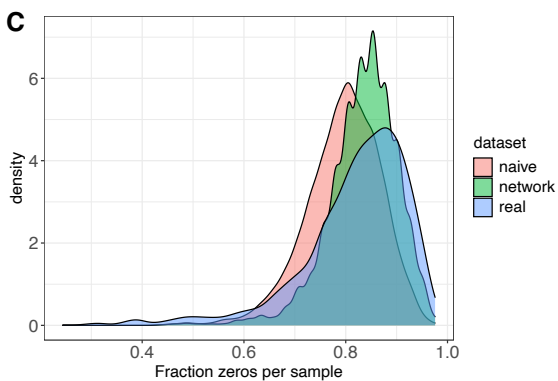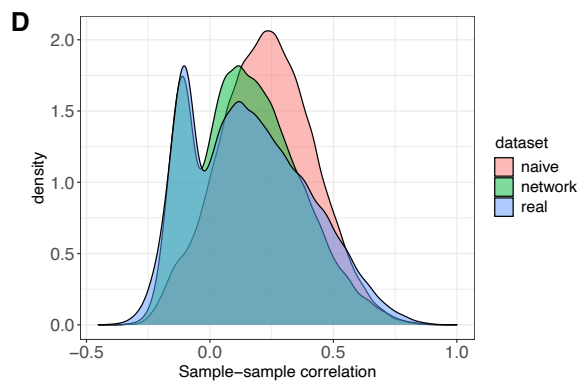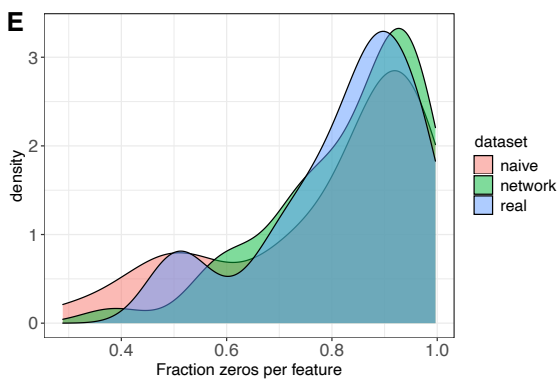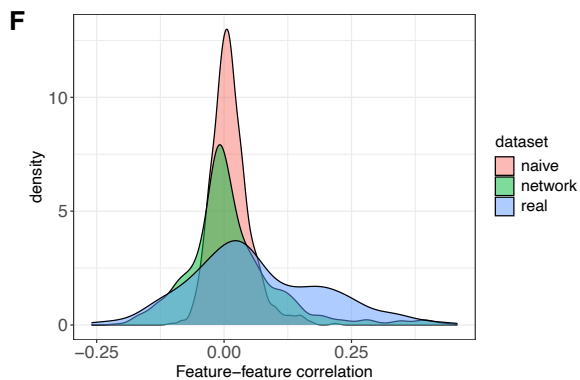

Supplement: pcbi.1010962.s004.pdf [file pcbi.1010962.s004.pdf]
