# Supplementary material for: One model fits all: Combining inference and simulation of gene regulatory networks
Source: PubMed Central journal article supplement (PMC10079230; doi:10.1371/journal.pcbi.1010962), 2023-03-27

**A** Original data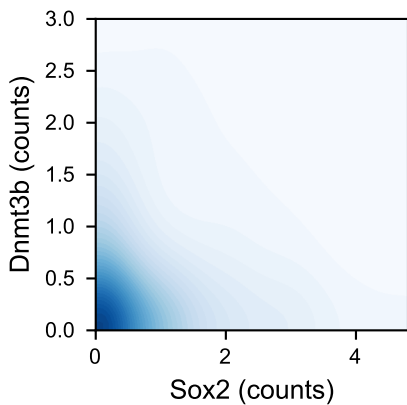**B** Inferred network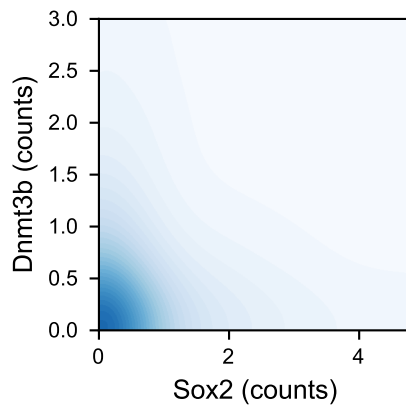**C** Without interactions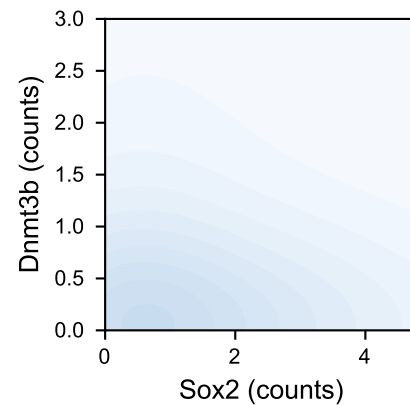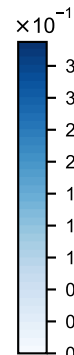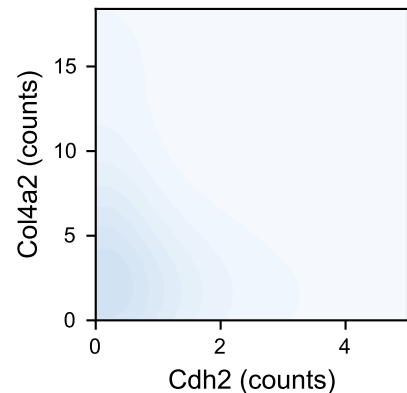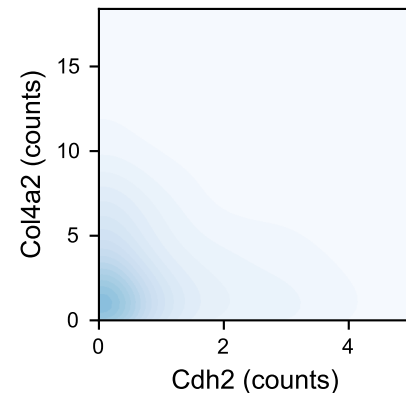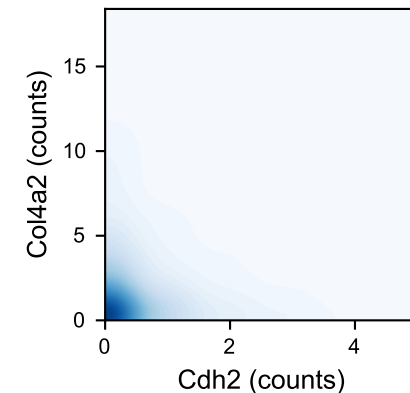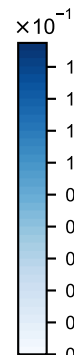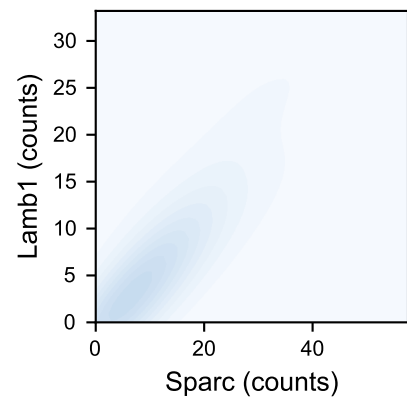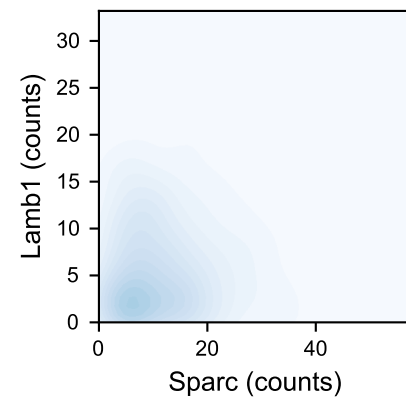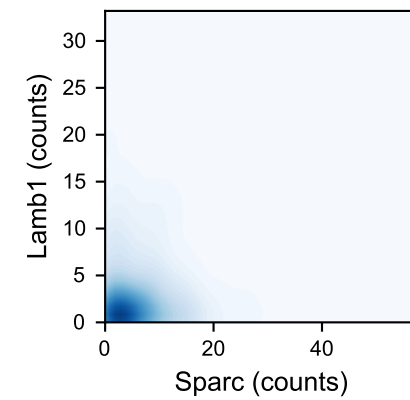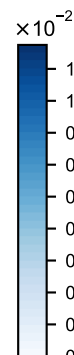

Supplement: pcbi.1010962.s006.pdf [file pcbi.1010962.s006.pdf]
