# Supplementary material for: One model fits all: Combining inference and simulation of gene regulatory networks
Source: PubMed Central journal article supplement (PMC10079230; doi:10.1371/journal.pcbi.1010962), 2023-03-27
Supplement: pcbi.1010962.s007.pdf [file pcbi.1010962.s007.pdf]

**A** Original data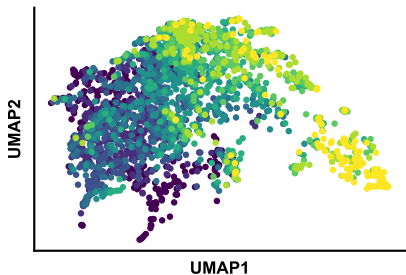**B** Inferred network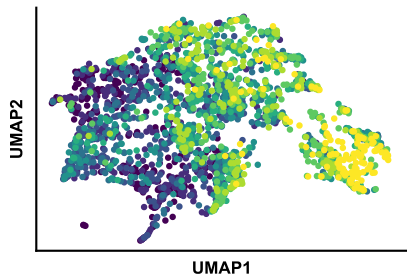**C** Original data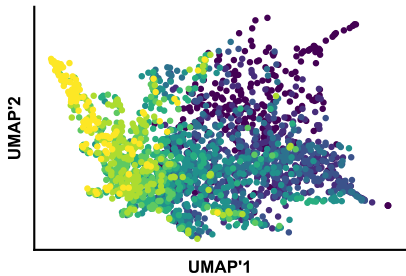**D** Without interactions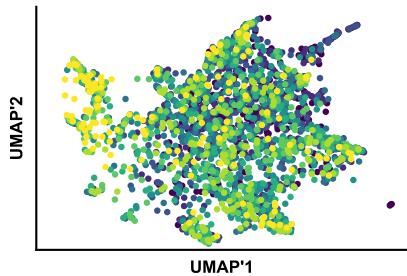

Timepoints: 0h 6h 12h 24h 36h 48h 60h 72h 96h
